# Supplementary material for: Pathogen Adaptation to American (Rpv3-1) and Eurasian (Rpv29) Grapevine Loci Conferring Resistance to Downy Mildew
Source: MDPI journal article supplement (doi:10.3390/plants11192619), 2022-10-05
Supplement: s1 [file s1]

**Supplementary Table S1.** List of *P. viticola* strains with their PSA (percentage of sporulating area) on Pinot noir, RP (reduction of PSA on Bianca and Mgaloblishvili compared to PN), expressed as percentages, and classification in adapted (A) or non-adapted (NA) strains according to RP<85% for Bianca and RP<25% for Mgaloblishvili.

| Strain      | PSA (%)    | RP (%) |                | Adaptation |                |
|-------------|------------|--------|----------------|------------|----------------|
|             | Pinot noir | Bianca | Mgaloblishvili | Bianca     | Mgaloblishvili |
| CAST7       | 7.2        | 74.6   | 0              | A          | A              |
| CASB11      | 15.2       | 99.2   | 0              | NA         | A              |
| CAST3       | 22.5       | 99.1   | 0              | NA         | A              |
| CASB6       | 22.6       | 95     | 0              | NA         | A              |
| REF14       | 22.7       | 92.6   | 0              | NA         | A              |
| SAC4        | 25.4       | 96.4   | 0              | NA         | A              |
| ZOX20.11    | 26.4       | 99.7   | 0              | NA         | A              |
| ZIN8        | 26.7       | 93.3   | 0              | NA         | A              |
| ZOX16.2.6   | 74.7       | 99.9   | 11.1           | NA         | A              |
| REF3A       | 62.4       | 98.8   | 18.2           | NA         | A              |
| BEB3        | 56.6       | 83.5   | 47.6           | A          | NA             |
| SAC3        | 19.6       | 77.3   | 51.3           | A          | NA             |
| CAST9       | 3.5        | 76.6   | 89.3           | A          | NA             |
| ZOX11.1.2.4 | 0.8        | 79     | 100            | A          | NA             |
| REF11       | 41.5       | 99.4   | 32.8           | NA         | NA             |
| REF12       | 42         | 100    | 34             | NA         | NA             |
| ZEN3        | 78.2       | 99.8   | 36             | NA         | NA             |
| CASB30      | 54.5       | 100    | 36.5           | NA         | NA             |
| CASB23      | 61.2       | 96.5   | 36.9           | NA         | NA             |
| REF8        | 40         | 100    | 45.7           | NA         | NA             |
| BET17       | 42         | 95.8   | 46.6           | NA         | NA             |
| VILLO6      | 69.5       | 98.2   | 47.1           | NA         | NA             |
| ZIN6        | 37.1       | 93.6   | 48.9           | NA         | NA             |
| ZOX6.1.1.1  | 35         | 95.4   | 49.3           | NA         | NA             |
| CASB18      | 24.1       | 98.1   | 52.3           | NA         | NA             |
| ZOX16.1.8   | 62.1       | 99     | 52.6           | NA         | NA             |
| CASB13      | 58         | 99.6   | 53.5           | NA         | NA             |
| ZOX16.2.1   | 12.3       | 100    | 58.8           | NA         | NA             |
| CASB31      | 65.8       | 100    | 61.9           | NA         | NA             |
| ZOX14.2.3   | 28.3       | 100    | 63.1           | NA         | NA             |
| ZIN7        | 38.8       | 100    | 66.3           | NA         | NA             |
| CAST8       | 63.3       | 100    | 66.7           | NA         | NA             |
| CASB14      | 31.8       | 98.9   | 71.4           | NA         | NA             |
| ZOX20.2.2   | 44.4       | 98.2   | 74             | NA         | NA             |
| REF3C       | 47.4       | 99.9   | 78.2           | NA         | NA             |
| CASB15      | 26         | 98.1   | 78.7           | NA         | NA             |
| ZOX6.1.8    | 3.4        | 100    | 79.9           | NA         | NA             |

|           |      |      |      |    |    |
|-----------|------|------|------|----|----|
| ZIN1      | 53.9 | 99.7 | 80   | NA | NA |
| BET3      | 11.8 | 100  | 84.5 | NA | NA |
| CASB4     | 18.7 | 99.7 | 85.7 | NA | NA |
| CAST1     | 49.9 | 98.6 | 88.3 | NA | NA |
| CASB51    | 96.1 | 100  | 89.8 | NA | NA |
| BEB6      | 8.8  | 100  | 92.3 | NA | NA |
| CAST6     | 35.5 | 99.5 | 92.9 | NA | NA |
| CAST12    | 97.3 | 100  | 94.3 | NA | NA |
| CASB36    | 53.9 | 98.9 | 96.8 | NA | NA |
| SAC9      | 0.5  | 100  | 100  | NA | NA |
| REF.F12   | 2.1  | 100  | 100  | NA | NA |
| ZOX11.2.2 | 2.3  | 100  | 100  | NA | NA |
| CASB1     | 2.8  | 100  | 100  | NA | NA |
| CASB9     | 8.2  | 100  | 100  | NA | NA |
| REF9      | 9.5  | 100  | 100  | NA | NA |
| ZEN9A     | 10.7 | 100  | 100  | NA | NA |
| REF1E     | 16.6 | 100  | 100  | NA | NA |
| REF13     | 17.6 | 100  | 100  | NA | NA |
| CAST10    | 18.6 | 100  | 100  | NA | NA |
| CASB12    | 20.6 | 94.7 | 100  | NA | NA |
| REF1A     | 20.9 | 100  | 100  | NA | NA |
| ZOX16.1.1 | 24.3 | 100  | 100  | NA | NA |
| BET6      | 25.1 | 100  | 100  | NA | NA |
| SAC6      | 34.9 | 99.2 | 100  | NA | NA |
| CASB16    | 40.9 | 100  | 100  | NA | NA |
| CASB3     | 44.5 | 99.3 | 100  | NA | NA |
| BET4      | 46.6 | 100  | 100  | NA | NA |
| ZOX6.19   | 49.6 | 94.3 | 100  | NA | NA |
| ZOX16.29  | 51.5 | 100  | 100  | NA | NA |
| SAC2      | 53.6 | 99.2 | 100  | NA | NA |
| CASB28    | 84.1 | 98.2 | 100  | NA | NA |
| ZIN2      | 86.1 | 100  | 100  | NA | NA |
| CASB5     | 92.2 | 100  | 100  | NA | NA |
| ZIN4      | 95.9 | 93   | 100  | NA | NA |
| ZOX20.2.9 | 96.8 | 100  | 100  | NA | NA |
